# Supplementary material for: Spatial and Temporal Evolution of Ecological Vulnerability Based on Vulnerability Scoring Diagram Model in Shennongjia, China
Source: Research Square preprint supplement (doi:10.21203/rs.3.rs-1011964/v1), 2021-11-01
Supplement: Supplementary file 1 [file 4bbd3b74a78590212cf7ca7c.xlsx]

## Sheet: 1996
	1	2	3	4	5	6			7	8	9	10	11	12	13	14	15	16
1	-0.0614993	0.881563	-0.0536241	0.11446	0.0218385	0.0123362			-0.00373397	0.0296792	0.0325763	0.00736083	0.00707126	0.0105227	0.000431777	-0.0028881	-0.000201245	0.000594513
2	-0.03944	0.106561	-0.0256842	-0.0392588	0.0659448	0.403868			-0.0124989	0.00875028	-0.0499798	0.673277	0.542377	-0.106563	-0.235568	-0.0170285	-0.00917356	0.00152925
3	0.264335	-0.145361	0.0171695	0.0648096	0.233852	0.00289591			-0.0345537	-0.05048	-0.0473961	-0.134702	0.298675	0.837511	-0.128397	0.101706	0.0757486	0.0497526
4	0.0240793	0.0774781	-0.0141426	-0.207844	-0.439897	0.0369577			-0.0857118	0.0943541	0.0441556	0.119663	-0.16202	0.0347912	-0.0575652	-0.0490675	0.0234433	-0.00729309
5	0.0652872	0.0105255	0.0199752	-0.0818171	0.0400554	-0.00411794			0.900235	-0.105914	0.00409602	0.224457	-0.281008	0.122057	-0.114095	0.0506201	-0.0731284	0.00910042
6	0.145883	0.22836	0.0427609	-0.283924	0.0384813	0.123797			0.0926417	0.89215	0.0968026	-0.0892765	0.029351	-0.0406884	-0.0242061	0.0287172	-0.0379938	-0.00980686
7	0.136382	0.0451445	0.00816519	0.0499986	0.0672795	-0.00706178			0.124943	-0.0516541	-0.0303973	-0.177665	0.24356	-0.0318056	0.0945935	-0.773388	-0.501054	-0.0546525
8	-0.0430118	0.130303	-0.0296231	-0.0121891	-0.191263	0.153643			0.0576818	0.145711	0.032868	0.2805	-0.0425386	0.158499	0.622815	-0.00622682	0.0198268	-0.00297739
9	0.716225	0.433347	0.980664	0.192205	0.0539395	-0.124479			-0.0147301	-0.117532	0.922399	0.106035	0.110055	0.0611448	0.19891	-0.00932433	0.00400096	0.000417765
10	0.257805	-0.0239783	0.0105092	0.156569	-0.0279092	0.00529998			0.299582	-0.108952	-0.0101214	-0.386354	0.546305	-0.368375	0.194202	0.409286	-0.0125137	0.130395
11	0.252531	-0.169592	0.0299615	0.0601899	0.2875	0.00210913			0.0733557	-0.0654449	-0.00170283	-0.00778408	0.0125598	-0.19226	0.0301224	-0.269708	0.654157	-0.521407
12	0.410654	-0.306311	0.0472953	0.118908	0.546281	0.00538694			-0.219925	-0.11342	0.0263294	0.216984	-0.293183	-0.224186	-0.0215618	0.196896	-0.347184	0.133105
13	-0.111386	-0.319413	-0.0337221	0.551954	0.103092	0.872368			0.00271238	-0.127081	0.138755	-0.344458	-0.227249	0.0376914	0.0369168	-0.00188941	0.000930808	-2.30414e-05
14	0.0530829	-0.0489686	0.00873421	-0.00695383	0.0823913	0.00100557			0.0350915	0.00615669	-0.00229396	0.0149487	-0.0320182	-0.0799687	0.00990972	-0.323187	0.432088	0.829279
15	0.112253	0.352079	0.0202542	-0.495233	0.227002	-0.0125521			-0.0221944	-0.0237565	-0.324871	0.126467	0.00437124	0.0934306	0.657944	0.0424488	0.0072061	-0.00125766
16	-0.196314	0.476452	-0.167309	0.437789	0.499069	-0.140089			0.0888818	0.311383	0.0665946	-0.0553043	-0.00100568	0.00208099	-0.0354269	0.00524875	-0.00241471	0.00187331

## Sheet: 2007
	1	2	3	4	5	6			7	8	9	10	11	12	13	14	15	16
1	-0.061382	0.701984	-0.0528205	0.0179943	-0.00891535	-0.00184824			-0.00936364	0.00594116	0.0103194	0.00177797	0.000180128	0.00424436	-0.00173535	0.000478799	0.000430615	-0.707107
2	-0.0311662	0.000443292	0.0904174	-0.044486	0.0422358	0.00282668			0.384704	-0.179015	0.781534	0.180342	-0.403516	0.00877136	-0.0284478	-0.00173648	0.00242767	-3.91179e-16
3	0.25285	0.00661147	-0.15104	-0.00821163	-0.0498059	0.264403			0.0256922	-0.0235244	0.0131046	-0.196257	-0.0644747	0.88497	0.0176731	-0.102067	0.0528294	-1.13229e-15
4	0.0210355	-0.00187584	0.105319	-0.257793	-0.138477	-0.308069			-0.0391388	0.0741794	-0.0207486	0.226571	-0.00973306	0.0174403	-0.0605831	-0.019933	-0.0119081	7.05844e-17
5	0.132707	0.017899	-0.105486	-0.138787	0.88797	-0.150516			-0.013221	0.0272157	-0.111261	0.329628	-0.0208076	0.114957	0.0523295	0.0438229	0.0166695	-2.7769e-16
6	0.150139	-0.00833956	-0.307109	-0.267068	-0.127492	-0.296469			0.294532	0.772266	0.0516162	-0.104112	-0.0789741	-0.0300824	0.0475831	0.0389117	-0.00562407	-3.1599e-16
7	0.145327	0.00879824	-0.0533222	0.00534621	0.105394	0.0771053			0.0112039	-0.0385477	0.0437023	-0.275834	0.0189331	-0.0380388	-0.649131	0.675261	-0.0108987	-2.00718e-15
8	-0.061382	0.521984	-0.0528205	0.0179943	0.0484392	-0.0957437			0.273216	0.0146025	0.199962	0.107619	0.547933	0.0541358	-0.00323665	0.00184265	0.0021871	5.20756e-16
9	0.700564	0.0828613	0.858527	0.338537	0.00584694	0.0551984			-0.598758	0.222572	0.53876	0.0741251	0.459995	0.0588062	-0.00400765	0.00334974	0.00598867	6.79457e-17
10	0.30435	0.0275279	-0.0258911	0.111397	0.276022	-0.00243741			-0.0300628	-0.113429	0.182537	-0.72662	0.00614195	-0.264099	0.383639	-0.0701437	0.142786	4.96595e-16
11	0.245032	0.0113532	-0.185385	-0.0378551	0.0834262	0.275265			0.0191881	0.00212022	0.0241645	-0.047491	0.013842	-0.1971	-0.324357	-0.467027	-0.675074	2.23507e-15
12	0.380632	0.0115794	-0.316889	-0.0335723	-0.136828	0.595264			-0.00104341	0.00287076	-0.0285965	0.359791	-0.0294396	-0.257398	0.285681	0.259489	0.184481	-8.07185e-16
13	-0.0960018	-0.0528788	-0.377044	0.636165	-0.00891535	-0.00184824			-0.00936364	0.00594116	0.0103194	0.00177797	0.000180128	0.00424436	-0.00173535	0.000478799	0.000430615	0.707107
14	0.0689999	0.00186341	-0.0768949	-0.0432625	0.0391165	0.0820823			0.0251136	0.0277751	-0.0115692	0.0123449	0.0188259	-0.139723	-0.481562	-0.48919	0.69743	2.38118e-15
15	0.103896	0.0558609	0.33195	-0.454632	-0.00996712	0.0961136			0.558732	-0.167551	-0.0779511	-0.026817	0.556603	0.00793585	0.0534865	0.00886081	0.00266349	5.18668e-16
16	-0.229637	0.0107468	0.389984	0.312071	0.233811	0.510265			0.123867	0.521277	-0.0160263	-0.0664145	-0.0530276	0.00424517	0.00633822	0.00026157	0.00543481	-1.03118e-16

## Sheet: 2018
	1	2	3	4	5	6			7	8	9	10	11	12	13	14	15	16
1	-0.02498	0.93762	-0.30524	-0.16087	0.02165	-0.00287			0.00346	-0.02428	0.0058	0.00657	-0.00327	-0.00407	0.00173	0.00124	-0.00045	0.00072
2	-0.03492	0.0361	0.10227	0.05742	-0.01367	0.04964			0.41779	0.03206	0.01016	0.87474	0.0002	-0.012	-0.20004	-0.00368	-0.00652	-0.00064
3	0.20084	-0.05064	-0.13052	-0.07063	-0.05844	0.24381			-0.01259	0.01974	0.00701	0.00172	0.03541	-0.87952	-0.03833	0.27638	0.11865	0.06982
4	0.33938	0.00127	-0.05236	0.05185	0.30355	-0.2703			0.04789	-0.02492	0.03142	0.01162	-0.19394	0.01918	0.01678	0.02813	0.00475	0.00034
5	0.30784	0.12584	-0.05067	0.02	0.12534	-0.17174			-0.03563	-0.0129	0.03438	0.00279	-0.25911	-0.02045	0.01996	-0.01978	-0.01558	0.01183
6	0.13581	-0.08927	-0.2547	-0.09864	-0.43057	-0.34237			0.15982	0.10062	0.74116	-0.03671	0.06884	0.00125	-0.02492	-0.06124	-0.02402	-0.01889
7	0.13537	-0.01039	-0.05215	0.00821	-0.01122	0.08911			-0.00188	0.01139	-0.01057	-0.01979	0.20213	0.15637	-0.11198	0.59045	-0.73068	-0.09849
8	-0.03463	0.05101	0.13082	0.08444	-0.20639	0.02311			-0.14552	-0.88786	0.10899	0.14672	0.05672	-0.00613	0.29587	0.06443	0.00061	0.00348
9	0.68526	0.04522	0.81207	-0.53427	0.14954	0.0751			0.01462	-0.00824	-0.0529	0.00768	0.86366	0.05182	-0.00202	-0.29205	0.0763	0.09234
10	-0.07548	-0.17052	-0.44183	-0.06214	0.50263	-0.04585			0.13737	0.05176	0.11137	0.15294	-0.0264	0.0333	0.65757	0.14024	0.01353	-0.00365
11	0.26024	-0.05442	-0.17995	-0.04798	-0.11946	0.32151			0.00315	-0.00398	-0.01122	0.00186	-0.0146	0.3411	-0.10272	0.35756	0.54061	-0.47918
12	0.3135	-0.10291	-0.26806	-0.16783	-0.16518	0.58362			-0.00929	-0.014	-0.01871	0.0405	-0.30022	0.11623	0.06254	-0.45227	-0.30173	0.13341
13	0.01444	0.02721	0.13308	0.782364	0.02843	0.15157			0.85478	-0.18331	-0.02274	-0.4265	-0.01377	-0.01555	0.03264	0.00236	-0.00107	0.00135
14	0.0563	-0.01715	-0.05672	-0.01309	-0.06685	0.06342			0.00766	0.00851	0.01202	-0.00755	-0.0291	0.25809	-0.07318	0.34799	0.248	0.85376
15	0.07989	0.16602	0.40531	0.06893	-0.4481	0.11124			0.00883	0.39582	-0.08712	0.05892	0.08336	0.01499	0.63373	0.08467	0.00864	-0.00397
16	-0.15092	0.13117	0.37816	0.11837	0.37059	0.4677			-0.15822	0.07307	0.64219	-0.02914	0.01533	0.01664	-0.0473	0.01593	0.01609	0.00546

## Sheet: TOTAL
	1	2	3	4	5	6		1	2	3	4	5	6		1	2	3	4	5	6
1	-0.0614993	0.881563	-0.0536241	0.11446	0.0218385	0.0123362		-0.061382	0.701984	-0.0528205	0.0179943	-0.00891535	-0.00184824		-0.02498	0.93762	-0.30524	-0.16087	0.02165	-0.00287
2	-0.03944	0.106561	-0.0256842	-0.0392588	0.0659448	0.403868		-0.0311662	0.000443292	0.0904174	-0.044486	0.0422358	0.00282668		-0.03492	0.0361	0.10227	0.05742	-0.01367	0.04964
3	0.264335	-0.145361	0.0171695	0.0648096	0.233852	0.00289591		0.25285	0.00661147	-0.15104	-0.00821163	-0.0498059	0.264403		0.20084	-0.05064	-0.13052	-0.07063	-0.05844	0.24381
4	0.0240793	0.0774781	-0.0141426	-0.207844	-0.439897	0.0369577		0.0210355	-0.00187584	0.105319	-0.257793	-0.138477	-0.308069		0.33938	0.00127	-0.05236	0.05185	0.30355	-0.2703
5	0.0652872	0.0105255	0.0199752	-0.0818171	0.0400554	-0.00411794		0.132707	0.017899	-0.105486	-0.138787	0.88797	-0.150516		0.30784	0.12584	-0.05067	0.02	0.12534	-0.17174
6	0.145883	0.22836	0.0427609	-0.283924	0.0384813	0.123797		0.150139	-0.00833956	-0.307109	-0.267068	-0.127492	-0.296469		0.13581	-0.08927	-0.2547	-0.09864	-0.43057	-0.34237
7	0.136382	0.0451445	0.00816519	0.0499986	0.0672795	-0.00706178		0.145327	0.00879824	-0.0533222	0.00534621	0.105394	0.0771053		0.13537	-0.01039	-0.05215	0.00821	-0.01122	0.08911
8	-0.0430118	0.130303	-0.0296231	-0.0121891	-0.191263	0.153643		-0.061382	0.521984	-0.0528205	0.0179943	0.0484392	-0.0957437		-0.03463	0.05101	0.13082	0.08444	-0.20639	0.02311
9	0.716225	0.433347	0.980664	0.192205	0.0539395	-0.124479		0.700564	0.0828613	0.858527	0.338537	0.00584694	0.0551984		0.68526	0.04522	0.81207	-0.53427	0.14954	0.0751
10	0.257805	-0.0239783	0.0105092	0.156569	-0.0279092	0.00529998		0.30435	0.0275279	-0.0258911	0.111397	0.276022	-0.00243741		-0.07548	-0.17052	-0.44183	-0.06214	0.50263	-0.04585
11	0.252531	-0.169592	0.0299615	0.0601899	0.2875	0.00210913		0.245032	0.0113532	-0.185385	-0.0378551	0.0834262	0.275265		0.26024	-0.05442	-0.17995	-0.04798	-0.11946	0.32151
12	0.410654	-0.306311	0.0472953	0.118908	0.546281	0.00538694		0.380632	0.0115794	-0.316889	-0.0335723	-0.136828	0.595264		0.3135	-0.10291	-0.26806	-0.16783	-0.16518	0.58362
13	-0.111386	-0.319413	-0.0337221	0.551954	0.103092	0.872368		-0.0960018	-0.0528788	-0.377044	0.636165	-0.00891535	-0.00184824		0.01444	0.02721	0.13308	0.78	0.02843	0.15157
14	0.0530829	-0.0489686	0.00873421	-0.00695383	0.0823913	0.00100557		0.0689999	0.00186341	-0.0768949	-0.0432625	0.0391165	0.0820823		0.0563	-0.01715	-0.05672	-0.01309	-0.06685	0.06342
15	0.112253	0.352079	0.0202542	-0.495233	0.227002	-0.0125521		0.103896	0.0558609	0.33195	-0.454632	-0.00996712	0.0961136		0.07989	0.16602	0.40531	0.06893	-0.4481	0.11124
16	-0.196314	0.476452	-0.167309	0.437789	0.499069	-0.140089		-0.229637	0.0107468	0.389984	0.312071	0.233811	0.510265		-0.15092	0.13117	0.37816	0.11837	0.37059	0.4677
	PC1	PC2	PC3	PC4	PC1	PC2	PC3	PC4	PC1	PC2	PC3	PC4
C1	-0.0614993	0.881563	-0.0536241	0.11446	-0.061382	0.701984	-0.0528205	0.0179943	-0.02498	0.93762	-0.30524	-0.16087
C2	-0.03944	0.106561	-0.0256842	-0.0392588	-0.0311662	0.000443292	0.0904174	-0.044486	-0.03492	0.0361	0.10227	0.05742
C3	0.264335	-0.145361	0.0171695	0.0648096	0.25285	0.00661147	-0.15104	-0.00821163	0.20084	-0.05064	-0.13052	-0.07063
C4	0.0240793	0.0774781	-0.0141426	-0.207844	0.0210355	-0.00187584	0.105319	-0.257793	0.33938	0.00127	-0.05236	0.05185
C5	0.0652872	0.0105255	0.0199752	-0.0818171	0.132707	0.017899	-0.105486	-0.138787	0.30784	0.12584	-0.05067	0.02
C6	0.145883	0.22836	0.0427609	-0.283924	0.150139	-0.00833956	-0.307109	-0.267068	0.13581	-0.08927	-0.2547	-0.09864
C7	0.136382	0.0451445	0.00816519	0.0499986	0.145327	0.00879824	-0.0533222	0.00534621	0.13537	-0.01039	-0.05215	0.00821
C8	-0.0430118	0.130303	-0.0296231	-0.0121891	-0.061382	0.521984	-0.0528205	0.0179943	-0.03463	0.05101	0.13082	0.08444
C9	0.716225	0.433347	0.980664	0.192205	0.700564	0.0828613	0.858527	0.338537	0.68526	0.04522	0.81207	-0.53427
C10	0.257805	-0.0239783	0.0105092	0.156569	0.30435	0.0275279	-0.0258911	0.111397	-0.07548	-0.17052	-0.44183	-0.06214
C11	0.252531	-0.169592	0.0299615	0.0601899	0.245032	0.0113532	-0.185385	-0.0378551	0.26024	-0.05442	-0.17995	-0.04798
C12	0.410654	-0.306311	0.0472953	0.118908	0.380632	0.0115794	-0.316889	-0.0335723	0.3135	-0.10291	-0.26806	-0.16783
C13	-0.111386	-0.319413	-0.0337221	0.551954	-0.0960018	-0.0528788	-0.377044	0.636165	0.01444	0.02721	0.13308	0.78
C14	0.0530829	-0.0489686	0.00873421	-0.00695383	0.0689999	0.00186341	-0.0768949	-0.0432625	0.0563	-0.01715	-0.05672	-0.01309
C15	0.112253	0.352079	0.0202542	-0.495233	0.103896	0.0558609	0.33195	-0.454632	0.07989	0.16602	0.40531	0.06893
C16	-0.196314	0.476452	-0.167309	0.437789	-0.229637	0.0107468	0.389984	0.312071	-0.15092	0.13117	0.37816	0.11837
